# Supplementary material for: Arabidopsis PCNAs form complexes with selected D-type cyclins
Source: Front Plant Sci. 2015 Jul 17;6:516. doi: 10.3389/fpls.2015.00516 (PMC4550699; doi:10.3389/fpls.2015.00516)
Supplement: Supplementary Table 1 — List of primers used in this study. [file DataSheet1.XLSX]

## Sheet: Supplelemtary Table 1
	Supplementary Table 1	List of primers used in this study
ORF Name	Forward primer sequence	Reverse primer sequence
ccdB	5’CTGATCGGCCATTACGGCCACAAGTTTGTACAAAAAAGCTG-3’	5’-CTGATCGGCCGAGGCGGCCACCACTTTGTACAAGAAAGCTG-3’
Spectinomycin resistance	5’-GGCATCCGCTTACAGACAAGCTGTGACCGTCTCCGGGACCACATGTTCATGCATGATATATCTC CC-3’	5’-GGAGGGCTTACCATCTGGCCCCAGTGCTGCAATGATCCGCCACATCGGGCACGAACCCAGTGGAC-3’
RFP150	5’-CACCATGGTGTCTAAGGGCGAAGAG-3’	5’-TTACACCTTGATTCTCATGGTCTG-3’
CYCD1;1	5’GGGGACAAGTTTGTACAAAAAAGCAGGCTTCATGAGGAGTTACCGTTTTAGTGATTATC-3’	5’-GGGGACCACTTTGTACAAGAAAGCTGGGTCCTATTAATTAGAGGTAGATGTTTCATCACCTAC-3’
CYCD2;1	5’GGGGACAAGTTTGTACAAAAAAGCAGGCTTCATGGCTGAGAATCTTGCTTGTGGTG-3’	5’-GGGGACCACTTTGTACAAGAAAGCTGGGTCCTATCATTGTTTTCTCCTCCTCTTGTTGCTG-3
CYCD3;1	5’GGGGACAAGTTTGTACAAAAAAGCAGGCTTCATGGCGATTCGGAAGGAGGAAGAAAG-3’	5’-GGGGACCACTTTGTACAAGAAAGCTGGGTCCTATTATGGAGTGGCTACGATTGCCCATGG-3’
CYCD3;2	5’GGGGACAAGTTTGTACAAAAAAGCAGGCTTCATGGCTTTGGAGAAAGAGGAAGAAGCG-3’	5’-GGGGACCACTTTGTACAAGAAAGCTGGGTCCTACTAGCGAGGACTACTAAGCACATCGAG-3’
CYCD3;3	5’GGGGACAAGTTTGTACAAAAAAGCAGGCTTCATGGCTTTAGAAGAGGAGGAAGAGAG-3’	5’-GGGGACCACTTTGTACAAGAAAGCTGGGTCCTATTAGCGAGGACTACTACTAAG-3’
CYCD4;1	5’GGGGACAAGTTTGTACAAAAAAGCAGGCTTCATGGCAGAGGAGAATCTAGAACTGAG-3’	5’-GGGGACCACTTTGTACAAGAAAGCTGGGTCCTATTAAGAAAGATGTGTATAAGAAGAAG-3’
CYCD4;2	5’GGGGACAAGTTTGTACAAAAAAGCAGGCTTCATGGCTGAATTTATGGAACCAAATCTTG-3’	5’-GGGGACCACTTTGTACAAGAAAGCTGGGTCCTATTAAGAAAGAGAAGTGAGGGAGGAGG-3
CYCD5;1	5’GGGGACAAGTTTGTACAAAAAAGCAGGCTTCATGGGTGAGCCTAAAGACAGTCTCGC-3’	5’-GGGGACCACTTTGTACAAGAAAGCTGGGTCCTATCATAGCCTACGCATTCTCTTGGCTGG-3’
CYCD6;1	5’GGGGACAAGTTTGTACAAAAAAGCAGGCTTCATGGAGTTTCATCTTGAACATCCTCTC-3’	5’-GGGGACCACTTTGTACAAGAAAGCTGGGTCCTATTAGTAACGACGAGTACTAGTTTTCC-3’
CYCD7;1	5’-GGGGACAAGTTTGTACAAAAAAGCAGGCTCCATGGATAATCTACTCTGCGAAGAATC-3’	5’-GGGGACCACTTTGTACAAGAAAGCTGGGTCCTAAATGTAATTTGACATTTCAATTG-3’
PCNA1	5’-GGGGACAAGTTTGTACAAAAAAGCAGGCTCCATGTTGGAGCTACGTCTTGTTC-3’	5’-GGGGACCACTTTGTACAAGAAAGCTGGGTCTTAGGGATTAGTGTCTTCTTCTTC-3’
PCNA2	5’-GGGGACAAGTTTGTACAAAAAAGCAGGCTCCATGTTGGAGCTTCGTTTAGTTC-3’	5’-GGGGACCACTTTGTACAAGAAAGCTGGGTCTTATTCTGGTTTGGTGTCTTCTTCTTC-3’
	The ORF specific sequence was underlined

## Sheet: Supplementary Table 2
Supplelemtary Table 2		The list of plasmids used in this study
Protein name	Gene number	Entry vector	Yeast destination vector	Type of vector
CycD1;1	AT1G70210	pDONR221CycD1;1_NOSTOP (ABRC)	pDHB1Gateway	Bait
CycD2;1	AT2G22490.1	pDONR221CycD2;1_NOSTOP (ABRC)	pDHB1Gateway	Bait
CycD3;1	AT4G34160	pDONR221CycD3;1_NOSTOP (ABRC)	pDHB1Gateway	Bait
CycD3;2	AT5G67260	pDONR221CycD3;2_NOSTOP (ABRC)	pDHB1Gateway	Bait
CycD3;3	AT3G50070	pDONR221CycD3;3_NOSTOP (ABRC)	pDHB1Gateway	Bait
CycD4;1	AT5G65420.1	pDONR221CycD4;1_NOSTOP (ABRC)	pDHB1Gateway	Bait
CycD4;2	AT5G10440	pDONR221CycD4;2_NOSTOP (ABRC)	pDHB1Gateway	Bait
CycD5;1	AT4G37630.1	pDONR221CycD5;1_NOSTOP (ABRC)	pDHB1Gateway	Bait
CycD6;1	AT4G03270	pDONR221CycD6;1_NOSTOP (ABRC)	pDHB1Gateway	Bait
CycD7;1	AT5G02110	pDONR221CycD7;1_NOSTOP (ABRC)	pDHB1Gateway	Bait
PCNA1	AT1G07370	Previously prepared Strzalka et al., 2012	pDHB1Gateway	Bait
PCNA2	AT2G29570	Previously prepared Strzalka et al., 2012	pDHB1Gateway	Bait
CycD1;1	AT1G70210	pDONR221CycD1;1_STOP (this study)	pPR3-NGateway	Prey
CycD2;1	AT2G22490.1	pDONR221CycD2;1_STOP (this study)	pPR3-NGateway	Prey
CycD3;1	AT4G34160	pDONR221CycD3;1_STOP (this study)	pPR3-NGateway	Prey
CycD3;2	AT5G67260	pDONR221CycD3;2_STOP (this study)	pPR3-NGateway	Prey
CycD3;3	AT3G50070	pDONR221CycD3;3_STOP (this study)	pPR3-NGateway	Prey
CycD4;1	AT5G65420.1	pDONR221CycD4;1_STOP (this study)	pPR3-NGateway	Prey
CycD4;2	AT5G10440	pDONR221CycD4;2_STOP (this study)	pPR3-NGateway	Prey
CycD5;1	AT4G37630.1	pDONR221CycD5;1_STOP (this study)	pPR3-NGateway	Prey
CycD6;1	AT4G03270	pDONR221CycD6;1_STOP (this study)	pPR3-NGateway	Prey
CycD7;1	AT5G02110	pDONR221CycD7;1_STOP (this study)	pPR3-NGateway	Prey
PCNA1	AT1G07370	pDONR221PCNA1_STOP (this study)	pPR3-NGateway	Prey
PCNA2	AT2G29570	pDONR221PCNA2_STOP (this study)	pPR3-NGateway	Prey
Protein name	Gene number	Entry vector	Plant destination vector	Type of fusion
CycD1;1	AT1G70210	pDONR221CycD1;1_NOSTOP (ABRC)	pH7m34GW	CycD1;1_NtermGFP
CycD2;1	AT2G22490.1	pDONR221CycD2;1_NOSTOP (ABRC)	pH7m34GW	CycD2;1_NtermGFP
CycD3;1	AT4G34160	pDONR221CycD3;1_NOSTOP (ABRC)	pH7m34GW	CycD3;1_NtermGFP
CycD3;2	AT5G67260	pDONR221CycD3;2_NOSTOP (ABRC)	pH7m34GW	CycD3;2_NtermGFP
CycD3;3	AT3G50070	pDONR221CycD3;3_NOSTOP (ABRC)	pH7m34GW	CycD3;3_NtermGFP
CycD4;1	AT5G65420.1	pDONR221CycD4;1_NOSTOP (ABRC)	pH7m34GW	CycD4;1_NtermGFP
CycD4;2	AT5G10440	pDONR221CycD4;2_NOSTOP (ABRC)	pH7m34GW	CycD4;2_NtermGFP
CycD5;1	AT4G37630.2	pDONR221CycD5;1_NOSTOP (ABRC)	pH7m34GW	CycD5;1_NtermGFP
CycD6;1	AT4G03270	pDONR221CycD6;1_NOSTOP (ABRC)	pH7m34GW	CycD6;1_NtermGFP
CycD7;1	AT5G02110	pDONR221CycD7;1_NOSTOP (ABRC)	pH7m34GW	CycD7;1_NtermGFP
CycD1;1	AT1G70210	pDONR221CycD1;1_NOSTOP (ABRC)	pK7m34GW	CycD1;1_CtermGFP
CycD2;1	AT2G22490.1	pDONR221CycD2;1_NOSTOP (ABRC)	pK7m34GW	CycD2;1_CtermGFP
CycD3;1	AT4G34160	pDONR221CycD3;1_NOSTOP (ABRC)	pK7m34GW	CycD3;1_CtermGFP
CycD3;2	AT5G67260	pDONR221CycD3;2_NOSTOP (ABRC)	pK7m34GW	CycD3;2_CtermGFP
CycD3;3	AT3G50070	pDONR221CycD3;3_NOSTOP (ABRC)	pK7m34GW	CycD3;3_CtermGFP
CycD4;1	AT5G65420.1	pDONR221CycD4;1_NOSTOP (ABRC)	pK7m34GW	CycD4;1_CtermGFP
CycD4;2	AT5G10440	pDONR221CycD4;2_NOSTOP (ABRC)	pK7m34GW	CycD4;2_CtermGFP
CycD5;1	AT4G37630.1	pDONR221CycD5;1_NOSTOP (ABRC)	pK7m34GW	CycD5;1_CtermGFP
CycD6;1	AT4G03270	pDONR221CycD6;1_NOSTOP (ABRC)	pK7m34GW	CycD6;1_CtermGFP
CycD7;1	AT5G02110	pDONR221CycD7;1_NOSTOP (ABRC)	pK7m34GW	CycD7;1_CtermGFP
CycD1;1	AT1G70210	pDONR221CycD1;1_NOSTOP (ABRC)	pK7FWG2	CycD1;1_GFP
CycD2;1	AT2G22490.1	pDONR221CycD2;1_NOSTOP (ABRC)	pK7FWG2	CycD2;1_GFP
CycD3;1	AT4G34160	pDONR221CycD3;1_NOSTOP (ABRC)	pK7FWG2	CycD3;1_GFP
CycD3;2	AT5G67260	pDONR221CycD3;2_NOSTOP (ABRC)	pK7FWG2	CycD3;2_GFP
CycD3;3	AT3G50070	pDONR221CycD3;3_NOSTOP (ABRC)	pK7FWG2	CycD3;3_GFP
CycD4;1	AT5G65420.1	pDONR221CycD4;1_NOSTOP (ABRC)	pK7FWG2	CycD4;1_GFP
CycD4;2	AT5G10440	pDONR221CycD4;2_NOSTOP (ABRC)	pK7FWG2	CycD4;2_GFP
CycD5;1	AT4G37630.1	pDONR221CycD5;1_NOSTOP (ABRC)	pK7FWG2	CycD5;1_GFP
CycD6;1	AT4G03270	pDONR221CycD6;1_NOSTOP (ABRC)	pK7FWG2	CycD6;1_GFP
CycD7;1	AT5G02110	pDONR221CycD7;1_NOSTOP (ABRC)	pK7FWG2	CycD7;1_GFP
PCNA1	AT1G07370	Previously prepared Strzalka et al., 2012	pH7m34GW	PCNA1_NtermGFP
PCNA2	AT2G29570	Previously prepared Strzalka et al., 2012	pK7m34GW	PCNA1_CtermGFP
PCNA1	AT1G07370	Previously prepared Strzalka et al., 2012	pH7m34GW	PCNA2_NtermGFP
PCNA2	AT2G29570	Previously prepared Strzalka et al., 2012	pK7m34GW	PCNA2_CtermGFP
PCNA1	AT1G07370	pDONR221PCNA1_STOP (this study)	pH7m24GW2	NtermGFP_PCNA1
PCNA2	AT2G29570	pDONR221PCNA2_STOP (this study)	pK7m24GW2	CtermGFP_PCNA1
PCNA1	AT1G07370	pDONR221PCNA1_STOP (this study)	pH7m24GW2	NtermGFP_PCNA2
PCNA2	AT2G29570	pDONR221PCNA2_STOP (this study)	pK7m24GW2	CtermGFP_PCNA2
PCNA1	AT1G07370	Previously prepared Strzalka et al., 2012	pK7FWG2	PCNA1_GFP
PCNA2	AT2G29570	Previously prepared Strzalka et al., 2012	pK7FWG2	PCNA2_GFP
PCNA1	AT1G07370	pDONR221PCNA1_STOP (this study)	pSITE-4CA	RFP_PCNA1
PCNA2	AT2G29570	pDONR221PCNA2_STOP (this study)	pSITE-4CA	RFP_PCNA2
RFP150	Aaccession: EU582019	pENTR/D-TOPO_RFP150STOP (this study)	pH7m24GW2	NtermGFP_RFP150
RFP150	Aaccession: EU582019	pENTR/D-TOPO_RFP150STOP (this study)	pH7m24GW2	CtermGFP_RFP150
